# Supplementary material
Source: publisher figshare collection journal article supplement (https://gsapubs.figshare.com/ndownloader/files/22747505)
Supplement: Supplementary file 1 [file 22747505]

## **GSA DATA REPOSITORY 2009224**

### **Geochemical Evidence for Sediment Accretion in the Costa Rica Frontal Prism**

Dawn Cardace (corresponding author)  
NASA Ames Research Center, M/S 239-4  
Moffett Field, CA 94035-1000  
dawn.cardace-1@nasa.gov

Julie D. Morris  
Ocean Sciences Division, National Science Foundation, 4201 Wilson Blvd.  
Arlington, VA 22230  
jdmorris@nsf.gov

#### **Sampling and Analytical Methods**

We analyzed 22 residues from ODP Leg 205 interstitial water whole round squeezed cakes, each consisting of 20-40 cm of compressed core from Sites 1254 (20 samples) or 1255 (2 samples) via ICP-MS. Leg 205 recovered core from pre-determined intervals in the sediment column, geared for locating zones of fluid flow, based on Leg 170 shipboard results. This work covers the suite of Leg 205 samples only.

In a microwave-assisted protocol, ~0.1 g of sediment were digested in acid (6 mL HNO<sub>3</sub> and 2 mL HF; modified from EPA Method 3052) and brought up to volume in dilute HNO<sub>3</sub> for a total dilution of 1/1000. ICP-MS analyses were carried out using an ELEMENT ThermoFinnegan instrument outfitted with a mixing tee delivery system for blending internal standard and sample solutions. Raw data underwent internal standard (In, mass = 115) normalization and blank subtraction prior to construction of calibration curves using standard reference materials (SRMs) from the U. S. Geological Survey (USGS; MAG-1, SCO-1, SDO-1, and SGR-1) and Canadian Research Council (CRC; MESS-1). Concentrations of procedural

blanks were typically <2% of unknowns, <8% for Cs. Replicate analyses agreed within 7% for Li, Rb, Cs, Ba; replicates agreed within 3% for Fe, Ti, Nb, Y. Measured and accepted values for SRMs agreed within error, except for Fe, which measured 7% too low with respect to MESS-3, Rb, which measured 6% too low with respect to SDO-1, and Li, which was consistently high and was normalized by applying a constant factor correction. Sample depths in meters below seafloor and vertical distance in meters above the nearest fault are provided.

### **3-component mixing model**

In a 3-component mixing calculation, ASH, LPS, and UPS were considered as endmembers. After consultation with P. Clift regarding the best available data for the ASH endmember, ASH data from Clift et al. (2005) were adopted as the best available sampling diversity with high silica pumice values from Deering et al. (2007) where elemental data for ash were lacking. LPS is the mean of six, Site 495 (off Guatemala) hemipelagic sediments available in the GEOROC database, chosen to capture as much of the natural variability in Cocos Plate sedimentary veneer as possible. UPS is an ODP Leg 170 core sample of frontal prism background sediment: Site 1041, 16X-6, 55-82 cm (Kimura et al., 1997).

A triangular mixing space was constrained by Ti and Nb concentrations in each endmember, and x's in Fig. 3 indicate mixing paths in 5% increments, connecting each endmember. For example, along the ASH-LPS mixing trajectory, the bulk sediment Ti and Nb contents for each endmember were identified; the ASH point is defined as 100% ASH, one step towards LPS is 95% ASH + 5% LPS, the next step towards LPS is 90% ASH + 10% LPS, and so forth. All observed data for Site 1254/1255 sediments fall within the Ti-Nb mixing space, and the relative proportions of each endmember were thus inferred after gridded lines for each 2.5% contour were overlain on the plot.

Table DR1. Selected sediment geochemical data for ODP Leg 205 sediments. Concentration units are ppm. mbsf=meters below seafloor. mafb=meters above fault base. Note that Al and K data are from ODP Leg 205 Initial Reports (Morris et al., 2003).

| Site  | Core | Section | Interval (cm) | Cur. depth | 1040 eq.depth | Unit | Ti   | Fe     | Y    | Nb  | Rb   | Ba     | K     | Al    |
|-------|------|---------|---------------|------------|---------------|------|------|--------|------|-----|------|--------|-------|-------|
| 1254A | 1R   | 3       | 52-87         | 153.5      | 123.5         | UPS  | 5682 | 56017  | 23.1 | 5.6 | 41.1 | 326.6  | 18595 | 85738 |
| 1254A | 2R   | 4       | 125-160       | 161.3      | 131.3         | UPS  | 5543 | 53981  | 23.2 | 5.8 | 42.4 | 332.8  |       |       |
| 1254A | 3R   | 3       | 125-165       | 169.4      | 139.4         | UPS  | 5063 | 112863 | 21.9 | 5.3 | 38.2 | 279.7  | 16602 | 94206 |
| 1254A | 4R   | 5       | 45-90         | 181.1      | 151.1         | UPS  | 5596 | 54485  | 24.3 | 6.2 | 42.3 | 323.2  | 18512 | 93836 |
| 1254A | 5R   | 5       | 50-90         | 190.4      | 160.4         | UPS  | 5282 | 58938  | 23.5 | 5.6 | 43.8 | 318.3  | 15772 | 82086 |
| 1254A | 6R   | 1       | 121-162       | 195.3      | 165.3         | UPS  | 5224 | 44345  | 14.4 | 5.6 | 13.4 | 129.0  |       |       |
| 1254A | 6R   | 2       | 125-166       | 197.0      | 167.0         | UPS  | 5532 | 56710  | 22.7 | 5.7 | 43.2 | 357.8  | 17931 | 90237 |
| 1254A | 7R   | 5       | 34-74         | 209.6      | 179.6         | UPS  | 5066 | 51714  | 23.6 | 5.5 | 38.8 | 272.6  | 16187 | 92036 |
| 1254A | 8R   | 4       | 0-45          | 217.7      | 187.7         | UPS  | 4765 | 52735  | 22.7 | 5.7 | 33.3 | 297.7  | 15274 | 89866 |
| 1254A | 9R   | 5       | 0-40          | 305.5      | 305.5         | UPS  | 4614 | 57600  | 27.2 | 5.6 | 42.2 | 293.4  | 17931 | 90872 |
| 1254A | 10R  | 6       | 0-40          | 316.7      | 316.7         | UPS  | 4943 | 54267  | 25.8 | 6.6 | 38.5 | 283.9  | 15274 | 84891 |
| 1254A | 11R  | 1       | 78-117        | 320.1      | 320.1         | UPS  | 4972 | 48068  | 12.4 | 5.9 | 15.8 | 243.4  |       |       |
| 1254A | 11R  | 5       | 63-103        | 325.7      | 325.7         | UPS  | 5080 | 53263  | 24.2 | 5.8 | 38.6 | 291.8  | 17599 | 91348 |
| 1254A | 12R  | 1       | 101-141       | 329.9      | 329.9         | UPS  | 4868 | 53440  | 39.0 | 5.9 | 36.4 | 253.5  | 16519 | 90184 |
| 1254A | 13R  | 3       | 100-145       | 342.5      | 342.5         | UPS  | 4791 | 55052  | 22.0 | 6.0 | 44.3 | 276.4  | 18678 | 93624 |
| 1254A | 13R  | 5       | 69-109        | 344.7      | 344.7         | UPS  | 4597 | 50379  | 26.0 | 5.7 | 40.6 | 318.3  |       |       |
| 1254A | 14R  | 3       | 0-40          | 350.8      | 350.8         | UPS  | 4546 | 47562  | 23.0 | 6.3 | 31.3 | 239.1  |       |       |
| 1254A | 14R  | 6       | 52-97         | 354.3      | 354.3         | UPS  | 4512 | 49189  | 23.3 | 6.2 | 31.6 | 280.4  | 15440 | 92512 |
| 1254A | 15R  | 3       | 0-44          | 360.7      | 371.2         | LPS  | 4247 | 50365  | 20.4 | 5.8 | 39.1 | 731.8  | 14444 | 81134 |
| 1254A | 16R  | 3       | 49-89         | 366.2      | 376.8         | LPS  | 4124 | 46628  |      | 6.1 | 51.6 | 1641.0 | 15689 | 79228 |
| 1255A | 2R   | 2       | 0-43          | 133.9      | 360.9         | UPS  | 4550 | 45907  | 20.5 | 7.1 | 38.3 | 363.5  | 15275 | 85156 |
| 1255A | 4R   | 1       | 0-38          | 152        | 378.9         | LPS  | 4002 | 47043  | 22.6 | 5.0 | 21.3 | 1194.5 | 14528 | 83092 |

Table DR2. Endmember concentrations for elements of interest. All data in ppm.

| Sample                                                       | Rb   | Sr    | Ba     | Ti   | Fe    | Ni    | Y    | Zr    | Nb  | Ce   | K     | Al    |
|--------------------------------------------------------------|------|-------|--------|------|-------|-------|------|-------|-----|------|-------|-------|
| UPS* (Kimura et al., 1997)                                   | 42.1 | 212.8 | 650.0  | 6774 | 69733 | 77.0  | 20.1 | 112.0 | 6.6 | 21.0 | 18537 | 91031 |
| LPS** (GEOROC)<br>(Clift et al., 2005; Deering et al., 2007) | 40.8 | 336.2 | 3941.5 | 3489 | 43715 | 170.4 | 31.1 | 105.1 | 4.2 | 28.1 | 15275 | 62557 |
| ASH***                                                       | 42.6 | 149.2 | 1424.9 | 1229 | 8030  | 74.7  | 6.7  | 83.3  | 9.7 | 41.9 | 26565 | 64886 |

NB. UPS\* = ODP Leg 170, Site 104116-X-6, 55-82 cm, 132.6 mbsf

LPS\*\* = ODP Leg 67, Site 495, mean of six Cocos Plate hemipelagic sediments

ASH\*\*\* = Sediment ash sequences or Costa Rica pumice
